# Supplementary material
Source: MDPI journal article supplement (https://www.mdpi.com/2073-4441/13/11/1531)
Supplement: s1 [file s1]

**Table S1.** (Denmark): number of chemical analyses for each element (n), account of LODs in the dataset, range of LODs, the number and percentage of analyses < LOD, the max substitute value and the number of analyses with the max substituted.

| Element         | unit | No of analyses (n) | < LOD (n) | < LOD (%) | LOD range (min-max) | max substitute concentration | n   |
|-----------------|------|--------------------|-----------|-----------|---------------------|------------------------------|-----|
| As              | µg/l | 17935              | 1491      | 8.3       | 0.01-1.0            | 1.5                          | 1   |
| Cd              | µg/l | 660                | 559       | 84.7      | 0.003-0.5           | 0.75                         | 1   |
| Cr              | µg/l | 454                | 245       | 54.0      | 0.01-0.5            | 0.75                         | 5   |
| Cu              | µg/l | 616                | 206       | 33.4      | 0.03-5.0            | 7.5                          | 1   |
| Ni              | µg/l | 18906              | 3487      | 18.4      | 0.02-3.0            | 4.5                          | 222 |
| Zn              | µg/l | 622                | 197       | 31.7      | 0.3-10.0            | 15                           | 1   |
| F               | mg/l | 17100              | 1132      | 6.6       | 0.02-0.5            | 0.75                         | 6   |
| SO <sub>4</sub> | mg/l | 17977              | 404       | 2.2       | 0.2-1.5             | 2.25                         | 4   |
| O <sub>2</sub>  | mg/l | 18975              | 3464      | 18.3      | 0.01-2.0            | 6                            | 1   |
| NO <sub>3</sub> | mg/l | 17822              | 12666     | 71.1      | 0.002-1.0           | 1.5                          | 323 |
| Fe              | mg/l | 17902              | 1136      | 6.3       | 0.0002-0.02         | 0.03                         | 1   |

**Table S2.** (Serbia): number of chemical analyses for each element (n), account of LODs in the dataset and percentage of analyses < LOD, the max substitute value and max LOD substituted.

| Element         | Unit | n   | <LOD (n) | <LOD (%) | LOD max |
|-----------------|------|-----|----------|----------|---------|
| As              | µg/l | 132 | 15       | 11%      | 4       |
| Cd              | µg/l | 130 | 31       | 24%      | 0.04    |
| Cr              | µg/l | 132 | 25       | 19%      | 0.4     |
| Cu              | µg/l | 132 | 19       | 14%      | 1.62    |
| Ni              | µg/l | 130 | 26       | 20%      | 2       |
| Zn              | µg/l | 124 | 6        | 5%       | 1       |
| F               | mg/l | 132 | 3        | 2%       | 0.1     |
| SO <sub>4</sub> | mg/l | 132 | 7        | 5%       |         |
| NO <sub>3</sub> | mg/l | 132 | 1        | 1%       |         |

**Table S3.** (Slovenia): number of chemical analyses for each element, account of LOQs in the dataset (two were reported in 2016), range of LOQs, the number and percentage of analyses < LOQ, the max substitute value and the number of analyses with the max substitute.

|                        | No. of analyses without anthropogenic influence | No. of analyses with anthropogenic influence | Low LOQ | % samples below low LOQ | High LOQ | % samples below high LOQ | % of samples below LOQ | max LOQ/2 |
|------------------------|-------------------------------------------------|----------------------------------------------|---------|-------------------------|----------|--------------------------|------------------------|-----------|
| As (µg/L)              | 86                                              | 92                                           | <0.1    | 7                       | <1       | 56                       | 63                     | 0.5       |
| Cd (µg/L)              | 87                                              | 91                                           | <0.01   | 31                      | <0.02    | 40                       | 71                     | 0.01      |
| Cr (µg/L)              | 87                                              | 91                                           | <0.4    | 31                      | <1       | 22                       | 53                     | 0.5       |
| Cu (µg/L)              | 87                                              | 92                                           | <0.1    | 4                       | <1       | 41                       | 45                     | 0.5       |
| F (mg/L)               | 83                                              | 92                                           | <0.04   | 18                      | <0.2     | 46                       | 64                     | 0.1       |
| Fe (mg/L)              | 86                                              | 92                                           | <0.04   | 35                      | <0.1     | 43                       | 79                     | 0.05      |
| Ni (µg/L)              | 87                                              | 92                                           | <0.1    | 13                      | <1       | 26                       | 38                     | 0.5       |
| Zn (µg/L)              | 87                                              | 92                                           | <9      | 35                      | <10      | 39                       | 74                     | 5         |
| SO <sub>4</sub> (mg/l) | 83                                              | 92                                           | nd      | 0                       | nd       | 0                        | 0                      | /         |
| NO <sub>3</sub> (mg/L) | 87                                              | 92                                           |         |                         | <2.2     | 4                        | 4                      | 1.1       |

**Table S4.** (Loire-Bretagne, France): number of chemical analyses for each element (n), account of value > LOQs in the dataset, range of LOQs (Low, high), percentage of analyses < LOQ, with high LOQ, the maximum value substituted

| Element   | All (n) | No of analysis > LOQ | low LOQ | high LOQ | < LOQ (%) |
|-----------|---------|----------------------|---------|----------|-----------|
| As (µg/l) | 16041   | 7283                 | 0.005   | 1.5      | 55%       |
| Cd (µg/l) | 3656    | 3187                 | 0.5     | 0.5      | 13%       |
| Cr (µg/l) | 9928    | 5453                 | 0       | 1.25     | 45%       |

|                        |       |       |       |     |     |
|------------------------|-------|-------|-------|-----|-----|
| Cu (µg/l)              | 17373 | 2920  | 0.005 | 1   | 83% |
| Fe (µg/l)              | 26361 | 11971 | 0     | 50  | 55% |
| Ni (µg/l)              | 4111  | 1694  | 0.025 | 1   | 59% |
| Zn (µg/l)              | 4378  | 3225  | 0.05  | 5   | 26% |
| F (mg/l)               | 10316 | 7527  | 0.005 | 5   | 27% |
| SO <sub>4</sub> (mg/l) | 29998 | 29021 | 0.05  | 2.5 | 3%  |
| NO <sub>3</sub> (mg/l) | 48554 | 43142 | 0.05  | 2.5 | 11% |

**Table S5.** (Internal basins, Catalonia): Number of analyses for each element (n) and number and percentage of analyses < LOD, range of LOD and maximum value imputed, with each method.

\*lrEM: “Log-Ratio EM Algorithm” method with the lrEM function for R-studio software (package [zCompositions v1.3.4].

| Element         | unit | All (n) | < LOD (n) | < LOD (%) | LOD range (min-max) | max substitute concentration lrEM* | max substitute concentration LOD/2 |
|-----------------|------|---------|-----------|-----------|---------------------|------------------------------------|------------------------------------|
| As              | µg/L | 2458    | 784       | 31.90     | 0.01 - 1            | 0.74                               | 0.5                                |
| Cd              | µg/L | 7061    | 6554      | 92.82     | -                   | -                                  | -                                  |
| Cu              | µg/L | 8243    | 2677      | 32.48     | 0.5 - 10            | 4.13                               | 2.5                                |
| Cr              | µg/L | 8162    | 6862      | 84.07     | 1 - 5               | -                                  | -                                  |
| Fe              | µg/L | 5963    | 2131      | 35.74     | 5 - 50              | -                                  | -                                  |
| Ni              | µg/L | 7077    | 4061      | 57.38     | 1 - 5               | -                                  | -                                  |
| Zn              | µg/L | 7322    | 1746      | 23.85     | 0.1 - 5             | 2.59                               | 2                                  |
| SO <sub>4</sub> | mg/l | 8301    | 66        | 0.80      | 8 - 10              | 8.66                               | 4                                  |
| NO <sub>3</sub> | mg/l | 8356    | 1252      | 14.98     | 0.1 - 5             | 3.16                               | 2.5                                |

**Table S6.** (Austria): Dataset overview, ranked by percentage of values below LOD or LOQ.

| Parameter       | Number of value below LOD or LOQ | Number of analysis (n) | % of values below LOD or LOQ | Max. LOD or LOQ (mg L <sup>-1</sup> ) | Min. LOD or LOQ (mg L <sup>-1</sup> ) |
|-----------------|----------------------------------|------------------------|------------------------------|---------------------------------------|---------------------------------------|
| As              | 21750                            | 28040                  | 77,57                        | 0,001                                 | 1,16E-04                              |
| Cd              | 27062                            | 28037                  | 96,52                        | 0,0001                                | 1,34E-05                              |
| Cl              | 3750                             | 43752                  | 8,57                         | 1                                     | 0,14                                  |
| Cr              | 23452                            | 28039                  | 83,64                        | 0,001                                 | 8,00E-05                              |
| Cu              | 15054                            | 28038                  | 53,69                        | 0,005                                 | 7,00E-05                              |
| Fe              | 29049                            | 43742                  | 66,41                        | 0,02                                  | 2,70E-04                              |
| Ni              | 21632                            | 28042                  | 77,14                        | 0,001                                 | 3,00E-05                              |
| Zn              | 7575                             | 28041                  | 27,01                        | 0,02                                  | 1,84E-04                              |
| SO <sub>4</sub> | 328                              | 43729                  | 0,75                         | 1                                     | 0,2                                   |
| NO <sub>3</sub> | 3028                             | 43767                  | 6,92                         | 1                                     | 0,14                                  |

**Table S7.** (Spain, DRB): Number and percentage of chemical analyses below the limit of quantification (LOQ), range of LOQs in the dataset and min and max substituted value.

| Element         | unit | Number of values < LOQ | Period with records | < LOQ (n) | < LOQ (%) | LOQ range (min-max) | Min   | Max    |
|-----------------|------|------------------------|---------------------|-----------|-----------|---------------------|-------|--------|
| As              | µg/l | 4234                   | 10-20               | 2642      | 62.40     | 0.1-5               | 0.102 | 801    |
| Cd              | µg/l | 4456                   | 11-20               | 3918      | 87.92     | 0.02-1              | 0.02  | 78     |
| Cr              | µg/l | 807                    | 11-13               | 279       | 34.57     | 1                   | 1     | 28     |
| Cu              | µg/l | 4332                   | 10-20               | 2474      | 57.11     | 1-6                 | 1     | 3590   |
| Ni              | µg/l | 799                    | 11-13               | 646       | 80.85     | 1-7                 | 0.59  | 19     |
| Zn              | µg/l | 1328                   | 10-16               | 535       | 40.2      | 0.002-0.06          | 0.002 | 6.06   |
| F               | mg/l | 3783                   | 10-20               | 1318      | 34.84     | 0.05-0.5            | 0.01  | 8.85   |
| Cl              | mg/l | 6457                   | 10-20               | 486       | 7.5       | 1-10                | 0.22  | 1152   |
| SO <sub>4</sub> | mg/l | 6341                   | 10-20               | 908       | 14.65     | 1-10                | 1     | 2822.2 |
| O <sub>2</sub>  | mg/l | 3091                   | 10-20               | -         | -         | -                   | 0.04  | 17.4   |
| NO <sub>3</sub> | mg/l | 6341                   | 10-20               | 1317      | 20.77     | 0.15-5              | 0.21  | 1105   |

**Table S8.** (Loire-Bretagne, France): Number of water sampling points with data for each element and each group of prevailing pressure.

| Element         | No sampling points | Agriculture (CLC) |     | Natural area (CLC) |     | Urban area (CLC) |     | Pollution point source (BASIAS) |     | Mining and mineralization |     |
|-----------------|--------------------|-------------------|-----|--------------------|-----|------------------|-----|---------------------------------|-----|---------------------------|-----|
| As              | 3512               | 2007              | 57% | 1303               | 37% | 202              | 6%  | 993                             | 28% | 442                       | 13% |
| Zn              | 495                | 353               | 71% | 93                 | 19% | 49               | 10% | 182                             | 37% | 54                        | 11% |
| Ni              | 2362               | 1413              | 60% | 823                | 35% | 126              | 5%  | 766                             | 32% | 458                       | 19% |
| Cd              | 3708               | 2111              | 57% | 1394               | 38% | 203              | 5%  | 1056                            | 28% | 458                       | 12% |
| Cr              | 426                | 294               | 69% | 88                 | 21% | 44               | 10% | 155                             | 36% | 59                        | 14% |
| Cu              | 435                | 304               | 70% | 86                 | 20% | 45               | 10% | 159                             | 37% | 54                        | 12% |
| F               | 3313               | 1953              | 59% | 1160               | 35% | 200              | 6%  | 974                             | 29% | 367                       | 11% |
| SO <sub>4</sub> | 3783               | 2152              | 57% | 1427               | 38% | 204              | 5%  | 1081                            | 29% | 470                       | 12% |

**Table S9.** (Denmark): Number of water sampling points with data for each element and each group of prevailing pressure and results from the Kruskal-Wallis rank sum test.

| Element         | all  | Prevailing pressures |      |            |     |        |      |       |      |             |      | Kruskal-Wallis<br>rank sum test |
|-----------------|------|----------------------|------|------------|-----|--------|------|-------|------|-------------|------|---------------------------------|
|                 |      | agricultural         |      | industrial |     | mining |      | urban |      | no or other |      |                                 |
|                 | n    | n                    | %    | n          | %   | n      | %    | n     | %    | n           | %    |                                 |
| As              | 6352 | 5447                 | 85.8 | 45         | 0.7 | 2      | 0.03 | 796   | 12.5 | 62          | 0.98 | Significant (p < 0.05)          |
| Cd              | 356  | 287                  | 80.6 | 17         | 4.8 |        |      | 52    | 14.6 |             |      | Significant (p < 0.05)          |
| Cr              | 250  | 187                  | 74.8 | 7          | 2.8 |        |      | 56    | 22.4 |             |      | Significant (p < 0.05)          |
| Cu              | 289  | 217                  | 75.1 | 7          | 2.4 |        |      | 64    | 22.1 | 1           | 0.35 | Significant (p < 0.05)          |
| Ni              | 6358 | 5452                 | 85.8 | 45         | 0.7 | 2      | 0.03 | 797   | 12.5 | 62          | 0.98 | Significant (p < 0.05)          |
| Zn              | 363  | 281                  | 77.4 | 19         | 5.2 |        | 0    | 62    | 17.1 | 1           | 0.28 | Not significantly different     |
| F               | 6349 | 5444                 | 85.7 | 45         | 0.7 | 2      | 0.03 | 796   | 12.5 | 62          | 0.98 | Significant (p < 0.05)          |
| SO <sub>4</sub> | 6360 | 5454                 | 85.8 | 45         | 0.7 | 2      | 0.03 | 797   | 12.5 | 62          | 0.97 | Significant (p < 0.05)          |

**Table S10.** (Spain, DRB): Number of water sampling points with data for each element and each group of prevailing pressure and results from the Kruskal-Wallis rank sum test

| Element         | all | agricultural |       | no or other |       | Kruskal-Wallis rank sum test |
|-----------------|-----|--------------|-------|-------------|-------|------------------------------|
|                 | n   | n            | %     | n           | %     |                              |
| As              | 460 | 358          | 22.17 | 102         | 77.82 | Not significant (p > 0.05)   |
| Cd              | 449 | 353          | 21.38 | 96          | 78.62 | Not significant (p < 0.05)   |
| Cu              | 461 | 358          | 22.34 | 103         | 77.66 | Not significant (p < 0.05)   |
| F               | 440 | 338          | 76.82 | 102         | 23.18 | Significant (p < 0.05)**     |
| SO <sub>4</sub> | 465 | 361          | 77.63 | 104         | 22.36 | Significant (p < 0.05)**     |

**Table S11.** (Austria): confusion matrix for lithology

| from / to                       | Metamorphic rocks | Sedimentary: clays and/ or marls | Sedimentary: gravel | Sedimentary: others | True classification (n) | % correct prediction |
|---------------------------------|-------------------|----------------------------------|---------------------|---------------------|-------------------------|----------------------|
| Metamorphic rocks               | 45                | 0                                | 8                   | 0                   | 53                      | 85%                  |
| Sedimentary: clays and/or marls | 3                 | 9                                | 145                 | 2                   | 159                     | 6%                   |
| Sedimentary: gravel             | 207               | 21                               | 911                 | 29                  | 1168                    | 78%                  |
| Sedimentary: other              | 135               | 2                                | 61                  | 0                   | 198                     | 0%                   |
| Total                           | 390               | 32                               | 1125                | 31                  | 1578                    | 61%                  |

**Table S12.** (Denmark): Natural background levels (NBL) for sedimentary aquifers combined with pH & redox conditions.

| HOVER-lithology | Elements | units | HOVER-pH | NBLs per water family |   |       |   | NBLs (only lithology) |
|-----------------|----------|-------|----------|-----------------------|---|-------|---|-----------------------|
|                 |          |       |          | HOVER-redox           |   |       |   |                       |
|                 |          |       |          | A                     | B | C & D | X |                       |

|                   |                 |                 |         |     |     |     |     |     |
|-------------------|-----------------|-----------------|---------|-----|-----|-----|-----|-----|
| <b>Sands</b>      | As              | $\mu\text{g/l}$ | Acidic  | NA  | NA  | 3   | NA  | 6.8 |
|                   |                 |                 | Basic   | 2.3 | NA  | 5.6 | 3.6 |     |
|                   |                 |                 | Neutral | 1.3 | NA  | 9.6 | 3.8 |     |
|                   | Ni              | $\mu\text{g/l}$ | Acidic  | NA  | NA  | 4.7 | NA  | 1.8 |
|                   |                 |                 | Basic   | 1.3 | NA  | 1   | 1.4 |     |
|                   |                 |                 | Neutral | 2.2 | NA  | 1.3 | 3.4 |     |
|                   | SO <sub>4</sub> | $\text{mg/l}$   | Acidic  | NA  | NA  | 87  | NA  | 87  |
|                   |                 |                 | Basic   | 68  | NA  | 74  | 86  |     |
|                   |                 |                 | Neutral | 86  | NA  | 89  | 111 |     |
|                   | F               | $\text{mg/l}$   | Acidic  | NA  | NA  | 0.7 | NA  | 0.4 |
|                   |                 |                 | Basic   | 0.2 | 0.2 | 0.3 | 0.2 |     |
|                   |                 |                 | Neutral | 0.3 | NA  | 0.4 | 0.3 |     |
| <b>Carbonates</b> | As              | $\mu\text{g/l}$ | Basic   | 2.2 | NA  | 4   | 3.3 | 3.9 |
|                   |                 |                 | Neutral | 2   | 2.7 | 4.7 | 7.7 |     |
|                   | Ni              | $\mu\text{g/l}$ | Basic   | 4   | NA  | 2.1 | 3.2 | 5.3 |
|                   |                 |                 | Neutral | 12  | 20  | 3   | 7.7 |     |
|                   | SO <sub>4</sub> | $\text{mg/l}$   | Basic   | 43  | NA  | 63  | 48  | 89  |
|                   |                 |                 | Neutral | 92  | 100 | 89  | 82  |     |
|                   | F               | $\text{mg/l}$   | Basic   | 0.3 | NA  | 0.9 | 1.3 | 1.2 |
|                   |                 |                 | Neutral | 0.4 | 0.8 | 1.2 | 1.7 |     |

**Table S13.** (Loire-Bretagne, France) Natural background levels (NBL) for the sedimentary aquifers combined with pH & redox conditions.

| Combined with pH & redox conditions: |          |       |          |                       |      |           |                       |
|--------------------------------------|----------|-------|----------|-----------------------|------|-----------|-----------------------|
| HOVER-lithology                      | Elements | units | HOVER-pH | NBLs per water family |      |           | NBLs (only lithology) |
|                                      |          |       |          | HOVER-redox           |      |           |                       |
|                                      |          |       |          | A & B                 | C&D  | All redox |                       |
| Sands                                | As       | µg/l  | All pH   | 1.1                   | 1.5  |           | 1.46                  |
|                                      | Ni       | µg/l  | Acidic   | 10.2                  | 13.5 |           | 2.3                   |
|                                      |          |       | Basic    | 1.3                   | 2.6  |           |                       |
|                                      |          |       | Neutral  | 2.1                   | 2.3  |           |                       |
|                                      | Zn       | µg/l  | Acidic   |                       |      | 16.6      | 12.3                  |
|                                      |          |       | Basic    |                       |      | 11.8      |                       |
|                                      |          |       | Neutral  |                       |      | 10        |                       |
|                                      | Cu       | µg/l  | Acidic   | 8                     |      |           | 4.4                   |
|                                      |          |       | Basic    |                       | 1.3  |           |                       |
|                                      |          |       | Neutral  | 8.8                   | 3.5  |           |                       |
| Carbonates                           | As       | µg/l  |          | 1.2                   | 6.4  |           | 3                     |
|                                      | Ni       | µg/l  | Acidic   |                       |      |           | 2.8                   |
|                                      |          |       | Basic    | 3.5                   | 0.6  |           |                       |
|                                      |          |       | Neutral  | 2.2                   | 5.5  |           |                       |
|                                      | Cu       | µg/l  | Basic    | 2.2                   | 0.3  |           |                       |
|                                      |          |       | Neutral  | 3.2                   | 0.6  |           |                       |

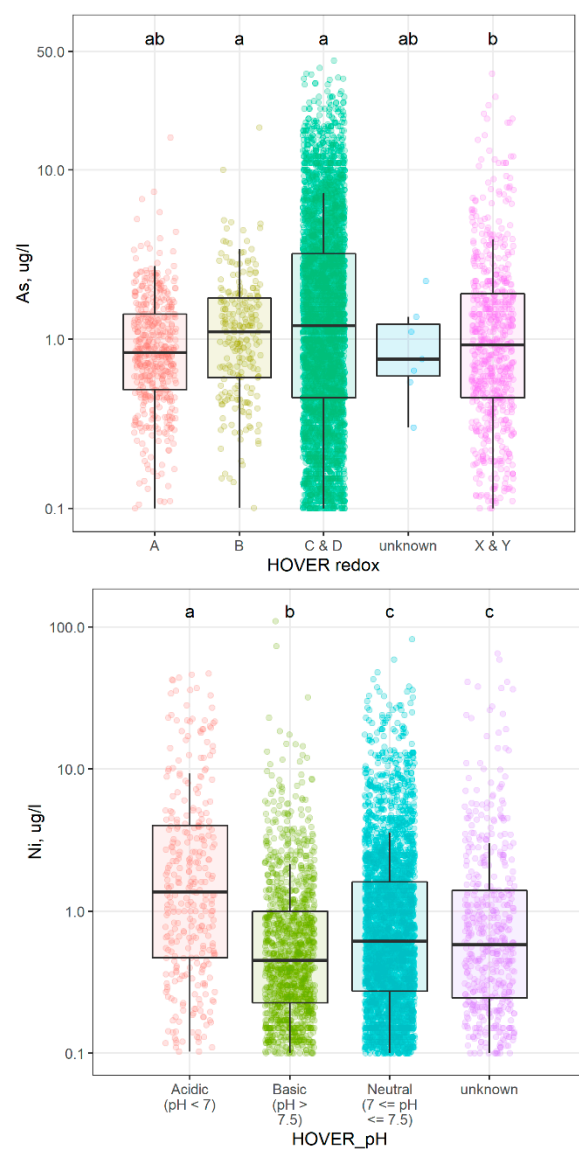

**Figure S.1.** Boxplots showing the variation of As and Ni concentrations in the Danish dataset for different pH and redox classes. The categories sharing letters (above the boxplot) are not significantly different at the 95% confidence level based on the post-hoc Nemenyi test [56].
